# Supplementary material for: A Source Area Approach Demonstrates Moderate Predictive Ability but Pronounced Variability of Invasive Species Traits
Source: PubMed Central journal article supplement (PMC4871327; doi:10.1371/journal.pone.0155547), 2016-05-17
Supplement: pone.0155547.s001.pdf [file pone.0155547.s001.pdf]

1 **S1 Fig. Proportions of non-woody vascular plants of the Austrian flora that are invasive (“yes”) or not invasive (“no”) in**  
 2 **other parts of the world in the different classes (= levels) of the analysed traits.** Given are all 14 used traits in their corresponding  
 3 trait group: (a) life history, (b) reproduction, (c) competitiveness, (d) habitat use, (e) propagule pressure.

4 (a)

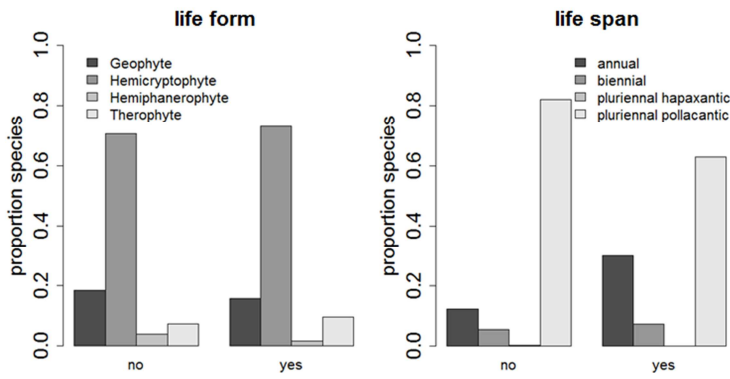

5

6 (b)

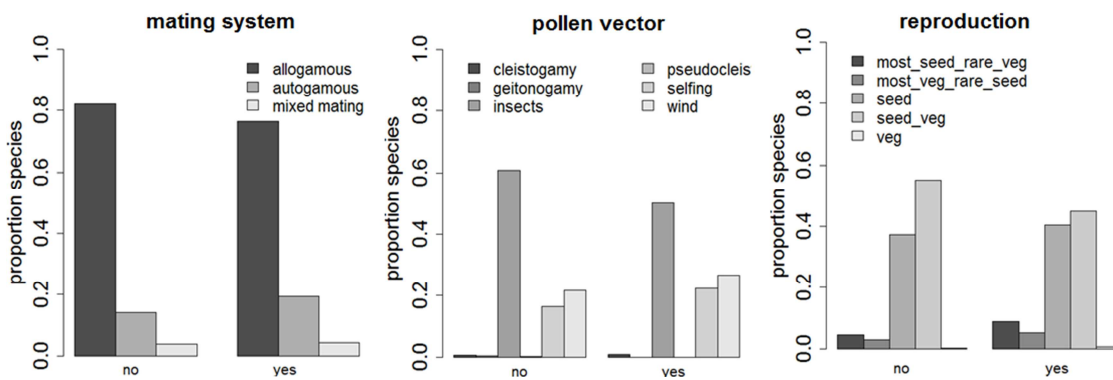

7

8 (c)

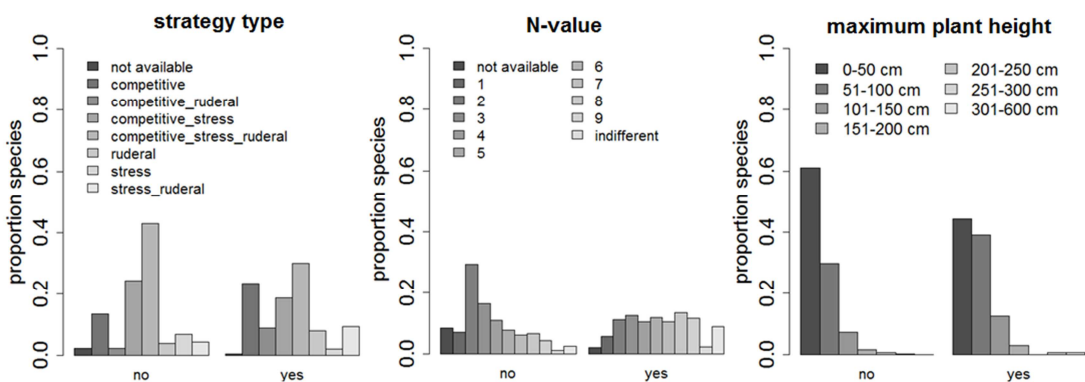

9

1 (d)

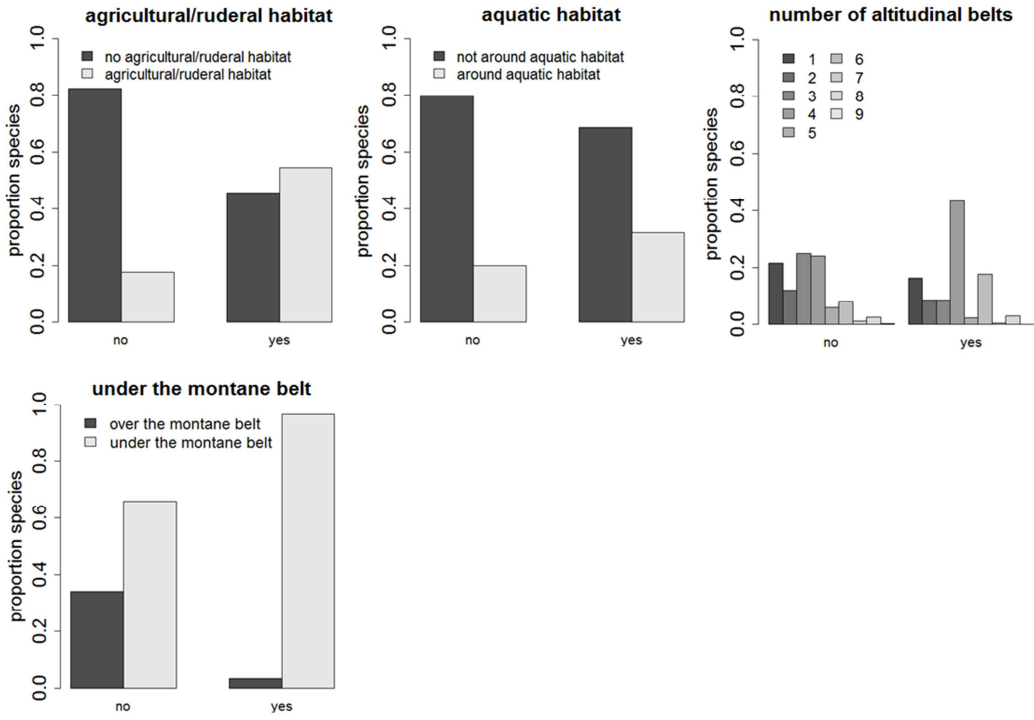

2

3 (e)

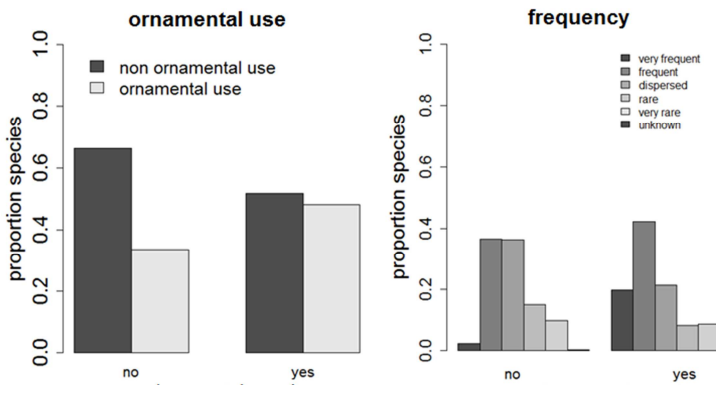

4
