# Supplementary material for: A Source Area Approach Demonstrates Moderate Predictive Ability but Pronounced Variability of Invasive Species Traits
Source: PubMed Central journal article supplement (PMC4871327; doi:10.1371/journal.pone.0155547), 2016-05-17
Supplement: pone.0155547.s002.pdf [file pone.0155547.s002.pdf]

**S1 Table. Categorization of 'maximum plant height'.**

| <b>factor classes</b> | <b>metric values (cm)</b> |
|-----------------------|---------------------------|
| 1                     | 0-10                      |
| 2                     | 11-20                     |
| 3                     | 21-30                     |
| 4                     | 31-40                     |
| 5                     | 41-50                     |
| 6                     | 51-60                     |
| 7                     | 61-70                     |
| 8                     | 71-80                     |
| 9                     | 81-100                    |
| 10                    | 101-150                   |
| 11                    | 151-200                   |
| 12                    | 201-600                   |
