# Supplementary material for: A Source Area Approach Demonstrates Moderate Predictive Ability but Pronounced Variability of Invasive Species Traits
Source: PubMed Central journal article supplement (PMC4871327; doi:10.1371/journal.pone.0155547), 2016-05-17
Supplement: pone.0155547.s003.pdf [file pone.0155547.s003.pdf]

**S2 Table. Candidate generalized linear mixed effects models (GLMM) evaluated based on the Akaike information criterion (AIC).** Numbers represent variable groups: (1) life history, (2) reproduction, (3) competitiveness, (4) habitat use, (5) propagule pressure. Variables within these groups were summarized by a multiple correspondence analysis and the first axis-values of these were used as predictors in the GLMMs. Bold markings refer to the most parsimonious model both without and with interactions. Also given is a marginal  $R^2$  [42, 43].

| <u>model</u>                   | $R^2$        | AIC            | <u>model</u>                   | $R^2$        | AIC            |
|--------------------------------|--------------|----------------|--------------------------------|--------------|----------------|
| <b>no interactions</b>         |              |                | <b>no interactions</b>         |              |                |
| 1 + 2 + 3 + 4 + 5              | 40.28        | 1134.20        | 2 + 3                          | 7.30         | 1371.85        |
| 1 + 2 + 3 + 4                  | 37.41        | 1178.69        | 2                              | 0.51         | 1424.17        |
| 1 + 2 + 3                      | 9.56         | 1356.25        | 2 + 4 + 5                      | 37.65        | 1156.00        |
| 1 + 2                          | 2.27         | 1411.19        | 2 + 4                          | 35.47        | 1200.64        |
| 1                              | 2.26         | 1409.23        | 2 + 5                          | 10.60        | 1340.41        |
| <b>1 + 3 + 4 + 5</b>           | <b>40.35</b> | <b>1133.00</b> | 3 + 4 + 5                      | 39.28        | 1145.60        |
| 1 + 3 + 4                      | 37.44        | 1176.95        | 3 + 4                          | 37.20        | 1180.22        |
| 1 + 4                          | 35.48        | 1198.88        | 3 + 5                          | 13.11        | 1322.49        |
| 1 + 4 + 5                      | 38.21        | 1148.46        | 3                              | 6.04         | 1379.76        |
| 1 + 5                          | 14.58        | 1312.03        | 4 + 5                          | 37.61        | 1157.68        |
| 2 + 3 + 4 + 5                  | 39.46        | 1141.73        | 4                              | 35.52        | 1199.15        |
| 2 + 3 + 4                      | 37.20        | 1180.08        | 5                              | 9.17         | 1350.47        |
| <b>model with interactions</b> |              |                | <b>model with interactions</b> |              |                |
| 1*2+3+4+5                      | 40.44        | 1135.99        | 2*3+4+5                        | 40.12        | 1140.38        |
| 1*3+2+4+5                      | 40.60        | 1135.39        | 2*3+4                          | 37.73        | 1179.34        |
| 1*4+2+3+5                      | 42.37        | 1131.71        | 2*3+1+5                        | 19.36        | 1280.02        |
| 1*5+2+3+4                      | 39.92        | 1134.96        | 2*3+5                          | 15.48        | 1307.87        |
| 2*3+1+4+5                      | 40.67        | 1133.33        | 2*3                            | 7.55         | 1373.14        |
| 2*4+1+3+5                      | 40.62        | 1135.53        | 2*4+1+3                        | 37.44        | 1180.66        |
| 2*5+1+3+4                      | 40.47        | 1135.89        | 2*4+1                          | 35.50        | 1202.88        |
| 3*4+1+2+5                      | 45.83        | 1129.91        | 2*4+3+5                        | 39.65        | 1143.51        |
| 3*5+1+2+4                      | 40.07        | 1135.15        | 2*4+3                          | 37.21        | 1182.08        |
| 4*5+1+2+3                      | 41.39        | 1135.78        | 2*4+1+5                        | 38.49        | 1151.63        |
| 1*2+3*4+5                      | 45.90        | 1131.71        | 2*4+5                          | 37.88        | 1157.82        |
| 1*2+3*5+4                      | 40.14        | 1136.92        | 2*4                            | 35.46        | 1202.64        |
| 1*2+4*5+3                      | 41.41        | 1137.56        | 2*5+1+3                        | 19.15        | 1280.88        |
| 1*3+2*4+5                      | 40.83        | 1136.78        | 2*5+1                          | 14.63        | 1315.06        |
| 1*3+2*5+4                      | 40.65        | 1137.14        | 2*5+3+4                        | 39.68        | 1143.32        |
| 1*3+4*5+2                      | 41.51        | 1137.00        | 2*5+3                          | 15.26        | 1308.75        |
| 1*4+2*3+5                      | 42.80        | 1131.22        | 2*5+1+4                        | 38.28        | 1152.02        |
| 1*4+2*5+3                      | 42.22        | 1133.60        | 2*5+4                          | 37.80        | 1157.76        |
| 1*4+3*5+2                      | 42.10        | 1132.79        | 2*5                            | 10.63        | 1342.39        |
| 1*5+2*3+4                      | 40.33        | 1133.99        | 3*4+1+2                        | 44.44        | 1172.82        |
| 1*5+2*4+3                      | 40.20        | 1136.00        | 3*4+1                          | 44.49        | 1171.11        |
| 1*5+3*4+2                      | 45.45        | 1130.75        | 3*4+2+5                        | 45.84        | 1136.21        |
| 2*3+4*5+1                      | 41.98        | 1134.87        | 3*4+2                          | 44.62        | 1173.52        |
| 2*4+3*5+1                      | 40.31        | 1136.60        | <b>3*4+1+5</b>                 | <b>45.92</b> | <b>1128.75</b> |
| 2*5+3*4+1                      | 46.12        | 1131.48        | 3*4+5                          | 46.08        | 1139.76        |
| 1*2+3+4                        | 37.58        | 1179.83        | 3*4                            | 44.80        | 1173.51        |
| 1*2+3                          | 9.64         | 1357.08        | 3*5+1+2                        | 19.12        | 1280.88        |
| 1*2+4+5                        | 38.20        | 1152.06        | 3*5+1                          | 18.89        | 1281.51        |
| 1*2+4                          | 35.62        | 1202.17        | 3*5+2+4                        | 39.29        | 1141.90        |
| 1*2+3+5                        | 19.16        | 1280.51        | 3*5+2                          | 14.98        | 1308.63        |
| 1*2+5                          | 14.66        | 1314.72        | 3*5+1+4                        | 40.12        | 1133.93        |
| 1*2                            | 2.38         | 1411.84        | 3*5+4                          | 39.06        | 1145.36        |
| 1*3+2+4                        | 37.59        | 1180.28        | 3*5                            | 12.77        | 1324.12        |
| 1*3+2                          | 9.75         | 1357.78        | 4*5+1+2                        | 39.59        | 1151.63        |
| 1*3+4+5                        | 40.70        | 1134.16        | 4*5+1                          | 39.59        | 1149.94        |
| 1*3+4                          | 37.63        | 1178.53        | 4*5+2+3                        | 41.04        | 1143.01        |
| 1*3+2+5                        | 19.39        | 1280.22        | 4*5+2                          | 39.47        | 1157.15        |
| 1*3+5                          | 19.19        | 1280.86        | 4*5+1+3                        | 41.39        | 1134.64        |
| 1*3                            | 9.58         | 1357.13        | 4*5+3                          | 40.81        | 1146.96        |
| 1*4+2+3                        | 39.40        | 1177.11        | 4*5                            | 39.38        | 1158.90        |
| 1*4+2                          | 37.75        | 1199.03        | 1*2+3*4                        | 44.65        | 1173.94        |
| 1*4+3+5                        | 42.40        | 1130.79        | 1*2+3*5                        | 19.14        | 1282.51        |

|         |       |         |         |       |         |
|---------|-------|---------|---------|-------|---------|
| 1*4+3   | 39.40 | 1175.50 | 1*2+4*5 | 39.64 | 1153.50 |
| 1*4+2+5 | 40.59 | 1147.50 | 1*3+2*4 | 37.62 | 1182.26 |
| 1*4+5   | 40.61 | 1145.96 | 1*3+2*5 | 19.38 | 1282.22 |
| 1*4     | 37.76 | 1197.05 | 1*3+4*5 | 41.77 | 1135.81 |
| 1*5+2+3 | 18.85 | 1278.84 | 1*4+2*3 | 39.71 | 1177.03 |
| 1*5+2   | 14.32 | 1312.16 | 1*4+2*5 | 40.62 | 1149.48 |
| 1*5+3+4 | 39.94 | 1133.51 | 1*4+3*5 | 42.15 | 1131.82 |
| 1*5+3   | 18.64 | 1278.98 | 1*5+2*3 | 19.04 | 1279.77 |
| 1*5+2+4 | 37.78 | 1150.19 | 1*5+2*4 | 38.14 | 1151.30 |
| 1*5+4   | 37.80 | 1148.32 | 1*5+3*4 | 45.52 | 1129.32 |
| 1*5     | 14.25 | 1310.81 | 2*3+4*5 | 41.68 | 1141.61 |
| 2*3+1+4 | 37.86 | 1178.19 | 2*4+3*5 | 39.39 | 1143.75 |
| 2*3+1   | 9.77  | 1357.55 | 2*5+3*4 | 46.17 | 1137.66 |
