# Supplementary material for: A Source Area Approach Demonstrates Moderate Predictive Ability but Pronounced Variability of Invasive Species Traits
Source: PubMed Central journal article supplement (PMC4871327; doi:10.1371/journal.pone.0155547), 2016-05-17
Supplement: pone.0155547.s004.pdf [file pone.0155547.s004.pdf]

**S3 Table. List of study species analysed and their status of being invasive somewhere outside their native distribution. The**

species are first ordered according to their status of being invasive outside of their native range, after a classification of species as environmental weeds in the latest edition of Randall's Global Compendium of Weeds [38]. Further species are listed alphabetically.

| Species name   env.weed   |   |                        |   |                         |   |
|---------------------------|---|------------------------|---|-------------------------|---|
| Achillea millefolium      | 1 | Cardaminopsis arenosa  | 0 | Lychnis viscaria        | 0 |
| Achillea nobilis          | 1 | Cardaminopsis halleri  | 0 | Lycopus europaeus       | 0 |
| Achillea ptarmica         | 1 | Cardaminopsis petraea  | 0 | Lycopus exaltatus       | 0 |
| Achnatherum calamagrostis | 1 | Carduus defloratus     | 0 | Maianthemum bifolium    | 0 |
| Acinos arvensis           | 1 | Carduus personata      | 0 | Malaxis monophyllos     | 0 |
| Aconitum napellus         | 1 | Carex acuta            | 0 | Melampyrum arvense      | 0 |
| Adoxa moschatellina       | 1 | Carex acutiformis      | 0 | Melampyrum cristatum    | 0 |
| Aegopodium podagraria     | 1 | Carex alba             | 0 | Melampyrum nemorosum    | 0 |
| Agrostis canina           | 1 | Carex appropinquata    | 0 | Melampyrum pratense     | 0 |
| Agrostis capillaris       | 1 | Carex atrata           | 0 | Melampyrum sylvaticum   | 0 |
| Agrostis gigantea         | 1 | Carex baldensis        | 0 | Melica ciliata          | 0 |
| Agrostis stolonifera      | 1 | Carex bigelowii        | 0 | Melica picta            | 0 |
| Aira caryophyllea         | 1 | Carex bohémica         | 0 | Melica transsilvanica   | 0 |
| Ajuga genevensis          | 1 | Carex brachystachys    | 0 | Melica uniflora         | 0 |
| Ajuga reptans             | 1 | Carex brunnescens      | 0 | Melilotus altissimus    | 0 |
| Allium carinatum          | 1 | Carex buekii           | 0 | Melilotus dentatus      | 0 |
| Allium oleraceum          | 1 | Carex buxbaumii        | 0 | Melittis melissophyllum | 0 |
| Allium scorodoprasum      | 1 | Carex canescens        | 0 | Mentha dumetorum        | 0 |
| Allium vineale            | 1 | Carex capillaris       | 0 | Mentha longifolia       | 0 |
| Alopecurus aequalis       | 1 | Carex caryophyllea     | 0 | Meum athamanticum       | 0 |
| Alopecurus geniculatus    | 1 | Carex cespitosa        | 0 | Milium effusum          | 0 |
| Alopecurus pratensis      | 1 | Carex chordorrhiza     | 0 | Minuartia hybrida       | 0 |
| Alyssum alyssoides        | 1 | Carex curvata          | 0 | Minuartia rubra         | 0 |
| Angelica sylvestris       | 1 | Carex davalliana       | 0 | Minuartia viscosa       | 0 |
| Anthoxanthum odoratum     | 1 | Carex demissa          | 0 | Moehringia ciliata      | 0 |
| Anthriscus sylvestris     | 1 | Carex diandra          | 0 | Moehringia muscosa      | 0 |
| Apium graveolens          | 1 | Carex digitata         | 0 | Moehringia trinervia    | 0 |
| Apium nodiflorum          | 1 | Carex dioica           | 0 | Molinia arundinacea     | 0 |
| Aquilegia vulgaris        | 1 | Carex distans          | 0 | Monotropa hypophegea    | 0 |
| Arctium minus             | 1 | Carex echinata         | 0 | Monotropa hypopitys     | 0 |
| Arenaria leptoclados      | 1 | Carex elata            | 0 | Montia fontana          | 0 |
| Arenaria serpyllifolia    | 1 | Carex elongata         | 0 | Muscari tenuiflorum     | 0 |
| Arrhenatherum elatius     | 1 | Carex ericetorum       | 0 | Myosotis alpestris      | 0 |
| Artemisia vulgaris        | 1 | Carex ferruginea       | 0 | Myosotis decumbens      | 0 |
| Aruncus dioicus           | 1 | Carex firma            | 0 | Myosotis nemorosa       | 0 |
| Atriplex prostrata        | 1 | Carex frigida          | 0 | Myosotis rehsteineri    | 0 |
| Barbarea vulgaris         | 1 | Carex fuliginosa       | 0 | Myosotis sparsiflora    | 0 |
| Bidens cernua             | 1 | Carex halleriana       | 0 | Narcissus radiiflorus   | 0 |
| Bidens radiata            | 1 | Carex hartmanii        | 0 | Neottia nidus-avis      | 0 |
| Bidens tripartita         | 1 | Carex heleonastes      | 0 | Nigritella nigra        | 0 |
| Bothriochloa ischaemum    | 1 | Carex hirta            | 0 | Nigritella rhellicani   | 0 |
| Brachypodium pinnatum     | 1 | Carex hordeistichos    | 0 | Nigritella rubra        | 0 |
| Brachypodium sylvaticum   | 1 | Carex hostiana         | 0 | Nigritella widderi      | 0 |
| Bromus erectus            | 1 | Carex humilis          | 0 | Nonea pulla             | 0 |
| Bromus hordeaceus         | 1 | Carex limosa           | 0 | Odontites luteus        | 0 |
| Bromus inermis            | 1 | Carex melanostachya    | 0 | Odontites vernus        | 0 |
| Bromus racemosus          | 1 | Carex michelii         | 0 | Odontites vulgaris      | 0 |
| Bryonia dioica            | 1 | Carex microglochin     | 0 | Omphalodes scorpioides  | 0 |
| Calamagrostis epigejos    | 1 | Carex montana          | 0 | Onobrychis arenaria     | 0 |
| Calystegia sepium         | 1 | Carex mucronata        | 0 | Onobrychis montana      | 0 |
| Campanula rapunculoides   | 1 | Carex muricata         | 0 | Onosma arenaria         | 0 |
| Capsella bursa-pastoris   | 1 | Carex nigra            | 0 | Ophrys apifera          | 0 |
| Cardamine flexuosa        | 1 | Carex oenensis         | 0 | Ophrys araneola         | 0 |
| Cardamine hirsuta         | 1 | Carex ornithopoda      | 0 | Ophrys holoserica       | 0 |
| Cardamine impatiens       | 1 | Carex ornithopodioides | 0 | Ophrys insectifera      | 0 |

|                         |   |                              |   |                                |   |
|-------------------------|---|------------------------------|---|--------------------------------|---|
| Cardamine pratensis     | 1 | Carex otrubae                | 0 | Ophrys sphegodes               | 0 |
| Carduus crispus         | 1 | Carex pairae                 | 0 | Orchis mascula                 | 0 |
| Carex brizoides         | 1 | Carex pallescens             | 0 | Orchis militaris               | 0 |
| Carex disticha          | 1 | Carex parviflora             | 0 | Orchis pallens                 | 0 |
| Carex divulsa           | 1 | Carex pauciflora             | 0 | Orchis palustris               | 0 |
| Carex flacca            | 1 | Carex paupercula             | 0 | Orchis purpurea                | 0 |
| Carex flava             | 1 | Carex pendula                | 0 | Orchis simia                   | 0 |
| Carex lepidocarpa       | 1 | Carex pilosa                 | 0 | Orchis spitzelii               | 0 |
| Carex ovalis            | 1 | Carex praecox                | 0 | Orchis tridentata              | 0 |
| Carex panicea           | 1 | Carex pulcaris               | 0 | Orchis ustulata                | 0 |
| Carex paniculata        | 1 | Carex randalpina             | 0 | Oreochloa disticha             | 0 |
| Carex pilulifera        | 1 | Carex remota                 | 0 | Ornithogalum pyrenaicum        | 0 |
| Carex punctata          | 1 | Carex rostrata               | 0 | Oxalis acetosella              | 0 |
| Carlina vulgaris        | 1 | Carex rupestris              | 0 | Oxyria digyna                  | 0 |
| Carpesium cernuum       | 1 | Carex secalina               | 0 | Oxytropis jacquini             | 0 |
| Carum carvi             | 1 | Carex sempervirens           | 0 | Oxytropis pilosa               | 0 |
| Catabrosa aquatica      | 1 | Carex spicata                | 0 | Papaver alpinum                | 0 |
| Centaurea jacea         | 1 | Carex strigosa               | 0 | Paris quadrifolia              | 0 |
| Centaurea montana       | 1 | Carex supina                 | 0 | Parnassia palustris            | 0 |
| Centaurea stoebe        | 1 | Carex sylvatica              | 0 | Pedicularis elongata           | 0 |
| Centaurium erythraea    | 1 | Carex tomentosa              | 0 | Pedicularis foliosa            | 0 |
| Centaurium pulchellum   | 1 | Carex umbrosa                | 0 | Pedicularis oederi             | 0 |
| Cerastium diffusum      | 1 | Carex vaginata               | 0 | Pedicularis palustris          | 0 |
| Cerastium dubium        | 1 | Carex viridula               | 0 | Pedicularis recutita           | 0 |
| Cerastium semidecandrum | 1 | Carex vulpina                | 0 | Pedicularis rostratocapitata   | 0 |
| Chelidonium majus       | 1 | Carlina acaulis              | 0 | Pedicularis rostratospicata    | 0 |
| Chenopodium polyspermum | 1 | Carlina biebersteinii        | 0 | Pedicularis sceptrum-carolinum | 0 |
| Cirsium arvense         | 1 | Centaurea phrygia            | 0 | Pedicularis sylvatica          | 0 |
| Cirsium oleraceum       | 1 | Centaurea pseudophrygia      | 0 | Pedicularis verticillata       | 0 |
| Cirsium palustre        | 1 | Centaurea scabiosa           | 0 | Peplis portula                 | 0 |
| Cirsium vulgare         | 1 | Centaurea stenolepis         | 0 | Persicaria amphibia            | 0 |
| Clinopodium vulgare     | 1 | Centaurea triumfettii        | 0 | Persicaria brittingeri         | 0 |
| Convallaria majalis     | 1 | Centaurium littorale         | 0 | Persicaria dubia               | 0 |
| Convolvulus arvensis    | 1 | Centunculus minimus          | 0 | Persicaria hydropiper          | 0 |
| Corynephorus canescens  | 1 | Cephalanthera damasonium     | 0 | Persicaria minor               | 0 |
| Crepis tectorum         | 1 | Cephalanthera longifolia     | 0 | Petasites albus                | 0 |
| Cuscuta epithymum       | 1 | Cephalanthera rubra          | 0 | Petasites hybridus             | 0 |
| Cynoglossum officinale  | 1 | Cerastium glutinosum         | 0 | Petasites paradoxus            | 0 |
| Cynosurus cristatus     | 1 | Cerastium pumilum            | 0 | Peucedanum alsaticum           | 0 |
| Cyperus longus          | 1 | Ceratocarpus claviculata     | 0 | Peucedanum carvifolia          | 0 |
| Dactylis glomerata      | 1 | Cerinth glabra               | 0 | Peucedanum cervaria            | 0 |
| Danthonia decumbens     | 1 | Chaerophyllum aromaticum     | 0 | Peucedanum officinale          | 0 |
| Daucus carota           | 1 | Chaerophyllum aureum         | 0 | Peucedanum oreoselinum         | 0 |
| Deschampsia flexuosa    | 1 | Chaerophyllum bulbosum       | 0 | Peucedanum ostruthium          | 0 |
| Dianthus armeria        | 1 | Chaerophyllum hirsutum       | 0 | Peucedanum palustre            | 0 |
| Elatine triandra        | 1 | Chaerophyllum temulum        | 0 | Phleum alpinum                 | 0 |
| Eleocharis palustris    | 1 | Chamorchis alpina            | 0 | Phleum bertolonii              | 0 |
| Elytrigia intermedia    | 1 | Chenopodium bonus-henricus   | 0 | Phleum hirsutum                | 0 |
| Elytrigia repens        | 1 | Chenopodium botryodes        | 0 | Phleum paniculatum             | 0 |
| Epilobium angustifolium | 1 | Chenopodium rubrum           | 0 | Phleum phleoides               | 0 |
| Epilobium hirsutum      | 1 | Chimaphila umbellata         | 0 | Phleum rhaeticum               | 0 |
| Epipactis helleborine   | 1 | Chrysosplenium alternifolium | 0 | Phyteuma betonicifolium        | 0 |
| Erica tetralix          | 1 | Cicerbita alpina             | 0 | Phyteuma hemisphaericum        | 0 |
| Erodium cicutarium      | 1 | Cicuta virosa                | 0 | Phyteuma nigrum                | 0 |
| Erophila verna          | 1 | Circaea alpina               | 0 | Phyteuma orbiculare            | 0 |
| Erysimum cheiranthoides | 1 | Circaea intermedia           | 0 | Phyteuma ovatum                | 0 |
| Erysimum repandum       | 1 | Circaea lutetiana            | 0 | Phyteuma spicatum              | 0 |
| Eupatorium cannabinum   | 1 | Cirsium acaule               | 0 | Pimpinella major               | 0 |
| Euphorbia cyparissias   | 1 | Cirsium canum                | 0 | Pimpinella nigra               | 0 |
| Euphorbia epithymoides  | 1 | Cirsium eriophorum           | 0 | Pimpinella saxifraga           | 0 |
| Euphorbia esula         | 1 | Cirsium helenioides          | 0 | Pinguicula alpina              | 0 |
| Euphorbia platyphyllos  | 1 | Cirsium rivulare             | 0 | Pinguicula vulgaris            | 0 |

|                          |   |                            |   |                               |   |
|--------------------------|---|----------------------------|---|-------------------------------|---|
| Filipendula ulmaria      | 1 | Cirsium spinosissimum      | 0 | Plantago alpina               | 0 |
| Fragaria vesca           | 1 | Cirsium tuberosum          | 0 | Plantago atrata               | 0 |
| Galanthus nivalis        | 1 | Clematis recta             | 0 | Plantago intermedia           | 0 |
| Galeopsis tetrahit       | 1 | Cochlearia pyrenaica       | 0 | Plantago maritima             | 0 |
| Galium aparine           | 1 | Coeloglossum viride        | 0 | Plantago media                | 0 |
| Galium palustre          | 1 | Colchicum autumnale        | 0 | Plantago strictissima         | 0 |
| Galium verum             | 1 | Coleanthus subtilis        | 0 | Plantago winteri              | 0 |
| Genista tinctoria        | 1 | Corallorrhiza trifida      | 0 | Platanthera bifolia           | 0 |
| Geranium lucidum         | 1 | Cortusa matthioli          | 0 | Platanthera chlorantha        | 0 |
| Geranium robertianum     | 1 | Corydalis cava             | 0 | Pleurospermum austriacum      | 0 |
| Geranium sanguineum      | 1 | Corydalis intermedia       | 0 | Poa alpina                    | 0 |
| Glechoma hederacea       | 1 | Corydalis pumila           | 0 | Poa angustifolia              | 0 |
| Glyceria declinata       | 1 | Corydalis solida           | 0 | Poa badensis                  | 0 |
| Holcus lanatus           | 1 | Crassula aquatica          | 0 | Poa cenisia                   | 0 |
| Holcus mollis            | 1 | Crepis alpestris           | 0 | Poa chaixii                   | 0 |
| Holosteum umbellatum     | 1 | Crepis aurea               | 0 | Poa glauca                    | 0 |
| Humulus lupulus          | 1 | Crepis bocconi             | 0 | Poa humilis                   | 0 |
| Hypericum humifusum      | 1 | Crepis conyzifolia         | 0 | Poa hybrida                   | 0 |
| Hypericum perforatum     | 1 | Crepis jacquinii           | 0 | Poa minor                     | 0 |
| Hypericum tetrapterum    | 1 | Crepis mollis              | 0 | Poa nemoralis                 | 0 |
| Hypochaeris glabra       | 1 | Crepis paludosa            | 0 | Poa remota                    | 0 |
| Hypochaeris radicata     | 1 | Crepis praemorsa           | 0 | Poa supina                    | 0 |
| Illecebrum verticillatum | 1 | Crepis pyrenaica           | 0 | Podospermum laciniatum        | 0 |
| Impatiens noli-tangere   | 1 | Crepis terglouensis        | 0 | Polemonium caeruleum          | 0 |
| Iris pseudacorus         | 1 | Crocus albiflorus          | 0 | Polycnemum verrucosum         | 0 |
| Iris spuria              | 1 | Cruciata glabra            | 0 | Polygala alpestris            | 0 |
| Juncus acutiflorus       | 1 | Cucubalus baccifer         | 0 | Polygala chamaebuxus          | 0 |
| Juncus articulatus       | 1 | Cuscuta europaea           | 0 | Polygala comosa               | 0 |
| Juncus bufonius          | 1 | Cuscuta lupuliformis       | 0 | Polygonatum multiflorum       | 0 |
| Juncus capitatus         | 1 | Cyclamen purpurascens      | 0 | Polygonatum odoratum          | 0 |
| Juncus compressus        | 1 | Cynoglossum germanicum     | 0 | Polygonatum verticillatum     | 0 |
| Juncus effusus           | 1 | Cyperus flavescens         | 0 | Potentilla alba               | 0 |
| Juncus gerardii          | 1 | Cyperus fuscus             | 0 | Potentilla anglica            | 0 |
| Juncus inflexus          | 1 | Cypripedium calceolus      | 0 | Potentilla anserina           | 0 |
| Juncus maritimus         | 1 | Dactylis polygama          | 0 | Potentilla aurea              | 0 |
| Juncus squarrosus        | 1 | Dactylorhiza cruenta       | 0 | Potentilla brauneana          | 0 |
| Knautia arvensis         | 1 | Dactylorhiza fuchsii       | 0 | Potentilla caulescens         | 0 |
| Lactuca saligna          | 1 | Dactylorhiza incarnata     | 0 | Potentilla clusiana           | 0 |
| Lactuca serriola         | 1 | Dactylorhiza lapponica     | 0 | Potentilla collina            | 0 |
| Lactuca virosa           | 1 | Dactylorhiza maculata      | 0 | Potentilla crantzii           | 0 |
| Lamium maculatum         | 1 | Dactylorhiza majalis       | 0 | Potentilla incana             | 0 |
| Lapsana communis         | 1 | Dactylorhiza sambucina     | 0 | Potentilla micrantha          | 0 |
| Lathyrus sylvestris      | 1 | Dactylorhiza traunsteineri | 0 | Potentilla mixta              | 0 |
| Leontodon autumnalis     | 1 | Danthonia alpina           | 0 | Potentilla neglecta           | 0 |
| Leontodon hispidus       | 1 | Daphne cneorum             | 0 | Potentilla pusilla            | 0 |
| Leontodon saxatilis      | 1 | Daphne striata             | 0 | Potentilla rupestris          | 0 |
| Lepidium latifolium      | 1 | Dentaria bulbifera         | 0 | Potentilla sterilis           | 0 |
| Leucanthemum vulgare     | 1 | Dentaria enneaphyllos      | 0 | Potentilla thuringiaca        | 0 |
| Linaria vulgaris         | 1 | Dentaria pentaphyllos      | 0 | Potentilla thyrsoflora        | 0 |
| Linum catharticum        | 1 | Deschampsia cespitosa      | 0 | Prenanthes purpurea           | 0 |
| Lolium perenne           | 1 | Deschampsia littoralis     | 0 | Primula auricula              | 0 |
| Lotus corniculatus       | 1 | Dianthus carthusianorum    | 0 | Primula clusiana              | 0 |
| Lotus pedunculatus       | 1 | Dianthus deltoides         | 0 | Primula elatior               | 0 |
| Ludwigia palustris       | 1 | Dianthus seguieri          | 0 | Primula farinosa              | 0 |
| Lunaria rediviva         | 1 | Dianthus superbus          | 0 | Primula hirsuta               | 0 |
| Luzula luzuloides        | 1 | Dianthus sylvestris        | 0 | Primula minima                | 0 |
| Luzula sylvatica         | 1 | Dichostylis micheliana     | 0 | Primula veris                 | 0 |
| Lychnis flos-cuculi      | 1 | Dictamnus albus            | 0 | Primula vulgaris              | 0 |
| Lysimachia nummularia    | 1 | Digitalis grandiflora      | 0 | Pseudolysimachion longifolium | 0 |
| Lysimachia thyrsoflora   | 1 | Digitalis lutea            | 0 | Pseudorchis albida            | 0 |
| Lysimachia vulgaris      | 1 | Doronicum austriacum       | 0 | Psilathera ovata              | 0 |
| Lythrum hyssopifolia     | 1 | Doronicum columnae         | 0 | Puccinellia distans           | 0 |

|                             |   |                            |   |                               |   |
|-----------------------------|---|----------------------------|---|-------------------------------|---|
| Lythrum salicaria           | 1 | Doronicum glaciale         | 0 | Puccinellia limosa            | 0 |
| Medicago falcata            | 1 | Doronicum grandiflorum     | 0 | Pulicaria dysenterica         | 0 |
| Medicago lupulina           | 1 | Doronicum pardalianches    | 0 | Pulicaria vulgaris            | 0 |
| Medicago minima             | 1 | Dorycnium germanicum       | 0 | Pulmonaria angustifolia       | 0 |
| Melica nutans               | 1 | Dorycnium herbaceum        | 0 | Pulmonaria mollis             | 0 |
| Mentha aquatica             | 1 | Drosera intermedia         | 0 | Pulmonaria obscura            | 0 |
| Mentha arvensis             | 1 | Drosera longifolia         | 0 | Pulmonaria officinalis        | 0 |
| Mentha pulegium             | 1 | Drosera obovata            | 0 | Pulsatilla alpina             | 0 |
| Mentha verticillata         | 1 | Drosera rotundifolia       | 0 | Pulsatilla micrantha          | 0 |
| Mercurialis perennis        | 1 | Dryas octopetala           | 0 | Pulsatilla pratensis          | 0 |
| Molinia caerulea            | 1 | Elatine hexandra           | 0 | Pulsatilla vernalis           | 0 |
| Muscari botryoides          | 1 | Elatine hydropiper         | 0 | Pulsatilla vulgaris           | 0 |
| Mycelis muralis             | 1 | Eleocharis acicularis      | 0 | Pyrola chlorantha             | 0 |
| Myosotis discolor           | 1 | Eleocharis austriaca       | 0 | Pyrola media                  | 0 |
| Myosotis laxa               | 1 | Eleocharis mamillata       | 0 | Pyrola minor                  | 0 |
| Myosotis scorpioides        | 1 | Eleocharis ovata           | 0 | Pyrola rotundifolia           | 0 |
| Myosotis sylvatica          | 1 | Eleocharis quinqueflora    | 0 | Radiola linoides              | 0 |
| Myosoton aquaticum          | 1 | Eleocharis uniglumis       | 0 | Ranunculus aconitifolius      | 0 |
| Narcissus pseudonarcissus   | 1 | Elyna myosuroides          | 0 | Ranunculus alpestris          | 0 |
| Nardus stricta              | 1 | Elytrigia atherica         | 0 | Ranunculus argoviensis        | 0 |
| Ononis repens               | 1 | Empetrum hermaphroditum    | 0 | Ranunculus breyninus          | 0 |
| Ononis spinosa              | 1 | Empetrum nigrum            | 0 | Ranunculus carinthiacus       | 0 |
| Origanum vulgare            | 1 | Epilobium alpestre         | 0 | Ranunculus cassubicifolius    | 0 |
| Pastinaca sativa            | 1 | Epilobium alsinifolium     | 0 | Ranunculus dactylophyllus     | 0 |
| Persicaria lapathifolia     | 1 | Epilobium anagallidifolium | 0 | Ranunculus glacialis          | 0 |
| Persicaria maculosa         | 1 | Epilobium collinum         | 0 | Ranunculus hybridus           | 0 |
| Petrorhagia prolifera       | 1 | Epilobium lamyi            | 0 | Ranunculus illyricus          | 0 |
| Phalaris arundinacea        | 1 | Epilobium lanceolatum      | 0 | Ranunculus lanuginosus        | 0 |
| Phleum pratense             | 1 | Epilobium montanum         | 0 | Ranunculus megacarpus         | 0 |
| Physalis alkekengi          | 1 | Epilobium nutans           | 0 | Ranunculus montanus           | 0 |
| Picris hieracioides         | 1 | Epilobium obscurum         | 0 | Ranunculus nemorosus          | 0 |
| Plantago major              | 1 | Epilobium palustre         | 0 | Ranunculus parnassifolius     | 0 |
| Poa annua                   | 1 | Epilobium parviflorum      | 0 | Ranunculus phragmiteti        | 0 |
| Poa bulbosa                 | 1 | Epilobium roseum           | 0 | Ranunculus platanifolius      | 0 |
| Poa compressa               | 1 | Epilobium tetragonum       | 0 | Ranunculus polyanthemoides    | 0 |
| Poa palustris               | 1 | Epipactis albensis         | 0 | Ranunculus polyanthemophyllus | 0 |
| Poa pratensis               | 1 | Epipactis atrorubens       | 0 | Ranunculus polyanthemus       | 0 |
| Poa trivialis               | 1 | Epipactis greuteri         | 0 | Ranunculus reptans            | 0 |
| Polygonum arenastrum        | 1 | Epipactis leptochila       | 0 | Ranunculus serpens            | 0 |
| Polygonum aviculare         | 1 | Epipactis microphylla      | 0 | Ranunculus villarsii          | 0 |
| Potentilla argentea         | 1 | Epipactis muelleri         | 0 | Rapistrum perenne             | 0 |
| Potentilla erecta           | 1 | Epipactis palustris        | 0 | Rhamnus pumila                | 0 |
| Potentilla reptans          | 1 | Epipogium aphyllum         | 0 | Rhinanthus alectorolophus     | 0 |
| Potentilla supina           | 1 | Erica carnea               | 0 | Rhinanthus angustifolius      | 0 |
| Pseudognaphalium luteoalbum | 1 | Erigeron acris             | 0 | Rhinanthus glacialis          | 0 |
| Ranunculus acris            | 1 | Erigeron alpinus           | 0 | Rhinanthus minor              | 0 |
| Ranunculus bulbosus         | 1 | Erigeron atticus           | 0 | Rhinanthus pulcher            | 0 |
| Ranunculus ficaria          | 1 | Erigeron glabratus         | 0 | Rhodiola rosea                | 0 |
| Ranunculus flammula         | 1 | Erigeron neglectus         | 0 | Rhodothamnus chamaecistus     | 0 |
| Ranunculus lingua           | 1 | Erigeron uniflorus         | 0 | Rhynchospora alba             | 0 |
| Ranunculus repens           | 1 | Eriophorum angustifolium   | 0 | Rhynchospora fusca            | 0 |
| Ranunculus sardous          | 1 | Eriophorum gracile         | 0 | Roegneria canina              | 0 |
| Ranunculus sceleratus       | 1 | Eriophorum latifolium      | 0 | Rorippa pyrenaica             | 0 |
| Rorippa amphibia            | 1 | Eriophorum scheuchzeri     | 0 | Rumex alpinus                 | 0 |
| Rorippa austriaca           | 1 | Eriophorum vaginatum       | 0 | Rumex aquaticus               | 0 |
| Rorippa palustris           | 1 | Erucastrum nasturtiifolium | 0 | Rumex arifolius               | 0 |
| Rorippa sylvestris          | 1 | Eryngium campestre         | 0 | Rumex hydrolapathum           | 0 |
| Rumex acetosa               | 1 | Eryngium planum            | 0 | Rumex maritimus               | 0 |
| Rumex acetosella            | 1 | Erysimum marschallianum    | 0 | Rumex palustris               | 0 |
| Rumex conglomeratus         | 1 | Erysimum odoratum          | 0 | Rumex thyrsoiflorus           | 0 |
| Rumex crispus               | 1 | Erysimum virgatum          | 0 | Sagina nodosa                 | 0 |
| Rumex obtusifolius          | 1 | Euphorbia dulcis           | 0 | Sagina normaniana             | 0 |

|                             |   |                          |   |                           |   |
|-----------------------------|---|--------------------------|---|---------------------------|---|
| Rumex sanguineus            | 1 | Euphorbia lucida         | 0 | Sagina saginoides         | 0 |
| Salsola kali                | 1 | Euphorbia palustris      | 0 | Salicornia europaea       | 0 |
| Salvia nemorosa             | 1 | Euphorbia salicifolia    | 0 | Salix alpina              | 0 |
| Salvia pratensis            | 1 | Euphorbia seguieriana    | 0 | Salix breviserrata        | 0 |
| Sambucus ebulus             | 1 | Euphorbia stricta        | 0 | Salix herbacea            | 0 |
| Samolus valerandi           | 1 | Euphorbia verrucosa      | 0 | Salix myrtilloides        | 0 |
| Sanguisorba minor           | 1 | Euphorbia villosa        | 0 | Salix reticulata          | 0 |
| Saponaria ocyroides         | 1 | Euphrasia hirtella       | 0 | Salix retusa              | 0 |
| Saponaria officinalis       | 1 | Euphrasia micrantha      | 0 | Salix serpyllifolia       | 0 |
| Sclerochloa dura            | 1 | Euphrasia minima         | 0 | Salvia glutinosa          | 0 |
| Securigera varia            | 1 | Euphrasia nemorosa       | 0 | Sanguisorba officinalis   | 0 |
| Sedum telephium             | 1 | Euphrasia officinalis    | 0 | Sanicula europaea         | 0 |
| Senecio jacobaea            | 1 | Euphrasia salisburgensis | 0 | Saussurea alpina          | 0 |
| Senecio sylvaticus          | 1 | Euphrasia stricta        | 0 | Saussurea discolor        | 0 |
| Senecio vulgaris            | 1 | Euphrasia tricuspidata   | 0 | Saussurea pygmaea         | 0 |
| Silene conica               | 1 | Falcaria vulgaris        | 0 | Saxifraga granulata       | 0 |
| Silene latifolia            | 1 | Fallopia dumetorum       | 0 | Saxifraga rotundifolia    | 0 |
| Solanum dulcamara           | 1 | Filago arvensis          | 0 | Saxifraga tridactylites   | 0 |
| Sonchus arvensis            | 1 | Filago lutescens         | 0 | Scabiosa canescens        | 0 |
| Sonchus asper               | 1 | Filago minima            | 0 | Scabiosa columbaria       | 0 |
| Sonchus oleraceus           | 1 | Filago vulgaris          | 0 | Scabiosa lucida           | 0 |
| Sonchus palustris           | 1 | Filipendula vulgaris     | 0 | Scabiosa ochroleuca       | 0 |
| Spergula morisonii          | 1 | Fragaria moschata        | 0 | Scheuchzeria palustris    | 0 |
| Spergula pentandra          | 1 | Fragaria viridis         | 0 | Schoenoplectus mucronatus | 0 |
| Spergularia media           | 1 | Fumana procumbens        | 0 | Schoenoplectus pungens    | 0 |
| Stachys palustris           | 1 | Gagea bohemica           | 0 | Schoenoplectus supinus    | 0 |
| Stellaria alsine            | 1 | Gagea fragifera          | 0 | Schoenoplectus triquetus  | 0 |
| Stellaria graminea          | 1 | Gagea lutea              | 0 | Schoenus ferrugineus      | 0 |
| Suaeda maritima             | 1 | Gagea minima             | 0 | Schoenus nigricans        | 0 |
| Symphytum officinale        | 1 | Gagea pomeranica         | 0 | Scilla bifolia            | 0 |
| Tamus communis              | 1 | Gagea pratensis          | 0 | Scirpoides holoschoenus   | 0 |
| Teesdalia nudicaulis        | 1 | Gagea spathacea          | 0 | Scirpus radicans          | 0 |
| Thlaspi perfoliatum         | 1 | Galeopsis bifida         | 0 | Scirpus sylvaticus        | 0 |
| Thymelaea passerina         | 1 | Galeopsis ladanum        | 0 | Scleranthus perennis      | 0 |
| Thymus pulegioides          | 1 | Galeopsis pubescens      | 0 | Scleranthus polycarpus    | 0 |
| Thymus serpyllum            | 1 | Galeopsis speciosa       | 0 | Scleranthus verticillatus | 0 |
| Torilis japonica            | 1 | Galium album             | 0 | Scorzonera austriaca      | 0 |
| Tragopogon dubius           | 1 | Galium aristatum         | 0 | Scorzonera hispanica      | 0 |
| Tragopogon pratensis        | 1 | Galium boreale           | 0 | Scorzonera humilis        | 0 |
| Trifolium arvense           | 1 | Galium glaucum           | 0 | Scorzonera parviflora     | 0 |
| Trifolium aureum            | 1 | Galium lucidum           | 0 | Scorzonera purpurea       | 0 |
| Trifolium campestre         | 1 | Galium megalospermum     | 0 | Scrophularia canina       | 0 |
| Trifolium dubium            | 1 | Galium pomeranicum       | 0 | Scrophularia nodosa       | 0 |
| Trifolium fragiferum        | 1 | Galium pumilum           | 0 | Scrophularia umbrosa      | 0 |
| Trifolium hybridum          | 1 | Galium schultesii        | 0 | Scutellaria galericulata  | 0 |
| Trifolium pratense          | 1 | Galium sternerii         | 0 | Scutellaria hastifolia    | 0 |
| Trifolium repens            | 1 | Galium sylvaticum        | 0 | Scutellaria minor         | 0 |
| Triglochin palustre         | 1 | Galium truniacum         | 0 | Sedum annuum              | 0 |
| Tussilago farfara           | 1 | Galium uliginosum        | 0 | Sedum atratum             | 0 |
| Valeriana officinalis       | 1 | Galium valdepilosum      | 0 | Sedum maximum             | 0 |
| Ventenata dubia             | 1 | Galium wirtgenii         | 0 | Sedum villosum            | 0 |
| Verbascum blattaria         | 1 | Genista germanica        | 0 | Selinum carvifolia        | 0 |
| Verbascum thapsus           | 1 | Genista pilosa           | 0 | Senecio abrotanifolius    | 0 |
| Veronica anagallis-aquatica | 1 | Genista sagittalis       | 0 | Senecio alpinus           | 0 |
| Veronica catenata           | 1 | Gentiana acaulis         | 0 | Senecio aquaticus         | 0 |
| Veronica hederifolia        | 1 | Gentiana asclepiadea     | 0 | Senecio doronicum         | 0 |
| Veronica serpyllifolia      | 1 | Gentiana bavarica        | 0 | Senecio erraticus         | 0 |
| Veronica verna              | 1 | Gentiana clusii          | 0 | Senecio erucifolius       | 0 |
| Vicia cracca                | 1 | Gentiana cruciata        | 0 | Senecio germanicus        | 0 |
| Vicia hirsuta               | 1 | Gentiana lutea           | 0 | Senecio hercynicus        | 0 |
| Vicia sepium                | 1 | Gentiana nivalis         | 0 | Senecio incanus           | 0 |
| Vicia tetrasperma           | 1 | Gentiana orbicularis     | 0 | Senecio ovatus            | 0 |

|                                  |   |                                  |   |                                  |   |
|----------------------------------|---|----------------------------------|---|----------------------------------|---|
| <i>Viola riviniana</i>           | 1 | <i>Gentiana pannonica</i>        | 0 | <i>Senecio paludosus</i>         | 0 |
| <i>Vulpia bromoides</i>          | 1 | <i>Gentiana pneumonanthe</i>     | 0 | <i>Senecio rupestris</i>         | 0 |
| <i>Aceras anthropophorum</i>     | 0 | <i>Gentiana punctata</i>         | 0 | <i>Senecio sarracenicus</i>      | 0 |
| <i>Achillea atrata</i>           | 0 | <i>Gentiana purpurea</i>         | 0 | <i>Senecio subalpinus</i>        | 0 |
| <i>Achillea clavennae</i>        | 0 | <i>Gentiana utriculosa</i>       | 0 | <i>Senecio viscosus</i>          | 0 |
| <i>Achillea collina</i>          | 0 | <i>Gentiana verna</i>            | 0 | <i>Serratula tinctoria</i>       | 0 |
| <i>Achillea macrophylla</i>      | 0 | <i>Gentianella amarella</i>      | 0 | <i>Seseli annuum</i>             | 0 |
| <i>Achillea pannonica</i>        | 0 | <i>Gentianella aspera</i>        | 0 | <i>Seseli hippomarathrum</i>     | 0 |
| <i>Achillea pratensis</i>        | 0 | <i>Gentianella bohemica</i>      | 0 | <i>Seseli libanotis</i>          | 0 |
| <i>Achillea salicifolia</i>      | 0 | <i>Gentianella campestris</i>    | 0 | <i>Sesleria albicans</i>         | 0 |
| <i>Achillea setacea</i>          | 0 | <i>Gentianella ciliata</i>       | 0 | <i>Sibbaldia procumbens</i>      | 0 |
| <i>Acinos alpinus</i>            | 0 | <i>Gentianella germanica</i>     | 0 | <i>Silaum silaus</i>             | 0 |
| <i>Aconitum austriacum</i>       | 0 | <i>Gentianella lutescens</i>     | 0 | <i>Silene armeria</i>            | 0 |
| <i>Aconitum degenii</i>          | 0 | <i>Gentianella tenella</i>       | 0 | <i>Silene dioica</i>             | 0 |
| <i>Aconitum hebegynum</i>        | 0 | <i>Geranium bohemicum</i>        | 0 | <i>Silene nutans</i>             | 0 |
| <i>Aconitum lycoctonum</i>       | 0 | <i>Geranium palustre</i>         | 0 | <i>Silene otites</i>             | 0 |
| <i>Aconitum pilipes</i>          | 0 | <i>Geranium phaeum</i>           | 0 | <i>Silene rupestris</i>          | 0 |
| <i>Aconitum pilosiusculum</i>    | 0 | <i>Geranium pratense</i>         | 0 | <i>Silene viscosa</i>            | 0 |
| <i>Aconitum tauricum</i>         | 0 | <i>Geranium sylvaticum</i>       | 0 | <i>Sisymbrium austriacum</i>     | 0 |
| <i>Aconitum variegatum</i>       | 0 | <i>Geum montanum</i>             | 0 | <i>Sisymbrium strictissimum</i>  | 0 |
| <i>Actaea spicata</i>            | 0 | <i>Geum reptans</i>              | 0 | <i>Sium latifolium</i>           | 0 |
| <i>Adenophora liliifolia</i>     | 0 | <i>Geum rivale</i>               | 0 | <i>Soldanella alpicola</i>       | 0 |
| <i>Adenostyles alliariae</i>     | 0 | <i>Geum urbanum</i>              | 0 | <i>Soldanella alpina</i>         | 0 |
| <i>Adenostyles glabra</i>        | 0 | <i>Gladiolus imbricatus</i>      | 0 | <i>Soldanella austriaca</i>      | 0 |
| <i>Adonis vernalis</i>           | 0 | <i>Gladiolus palustris</i>       | 0 | <i>Soldanella minima</i>         | 0 |
| <i>Agrimonia eupatoria</i>       | 0 | <i>Glaux maritima</i>            | 0 | <i>Soldanella montana</i>        | 0 |
| <i>Agrimonia procera</i>         | 0 | <i>Globularia cordifolia</i>     | 0 | <i>Solidago virgaurea</i>        | 0 |
| <i>Agrostis agrostiflora</i>     | 0 | <i>Globularia nudicaulis</i>     | 0 | <i>Spergularia echinosperma</i>  | 0 |
| <i>Agrostis alpina</i>           | 0 | <i>Gnaphalium hoppeanum</i>      | 0 | <i>Spergularia salina</i>        | 0 |
| <i>Agrostis rupestris</i>        | 0 | <i>Gnaphalium norvegicum</i>     | 0 | <i>Spiranthes aestivalis</i>     | 0 |
| <i>Agrostis schleicheri</i>      | 0 | <i>Gnaphalium supinum</i>        | 0 | <i>Spiranthes spiralis</i>       | 0 |
| <i>Agrostis vinealis</i>         | 0 | <i>Gnaphalium sylvaticum</i>     | 0 | <i>Stachys alpina</i>            | 0 |
| <i>Ajuga pyramidalis</i>         | 0 | <i>Gnaphalium uliginosum</i>     | 0 | <i>Stachys germanica</i>         | 0 |
| <i>Allium angulosum</i>          | 0 | <i>Goodyera repens</i>           | 0 | <i>Stachys recta</i>             | 0 |
| <i>Allium cirrhosum</i>          | 0 | <i>Gratiola officinalis</i>      | 0 | <i>Stachys sylvatica</i>         | 0 |
| <i>Allium kochii</i>             | 0 | <i>Gymnadenia conopsea</i>       | 0 | <i>Stellaria longifolia</i>      | 0 |
| <i>Allium lusitanicum</i>        | 0 | <i>Gymnadenia odoratissima</i>   | 0 | <i>Stellaria neglecta</i>        | 0 |
| <i>Allium rotundum</i>           | 0 | <i>Gypsophila muralis</i>        | 0 | <i>Stellaria nemorum</i>         | 0 |
| <i>Allium schoenoprasum</i>      | 0 | <i>Hammarbya paludosa</i>        | 0 | <i>Stellaria palustris</i>       | 0 |
| <i>Allium sphaerocephalon</i>    | 0 | <i>Hedysarum hedysaroides</i>    | 0 | <i>Stipa borysthena</i>          | 0 |
| <i>Allium strictum</i>           | 0 | <i>Helianthemum alpestre</i>     | 0 | <i>Stipa capillata</i>           | 0 |
| <i>Allium suaveolens</i>         | 0 | <i>Helianthemum apenninum</i>    | 0 | <i>Stipa dasyphylla</i>          | 0 |
| <i>Allium ursinum</i>            | 0 | <i>Helianthemum canum</i>        | 0 | <i>Stipa eriocalis</i>           | 0 |
| <i>Allium victorialis</i>        | 0 | <i>Helianthemum nummularium</i>  | 0 | <i>Stipa pennata</i>             | 0 |
| <i>Alopecurus rendlei</i>        | 0 | <i>Helichrysum arenarium</i>     | 0 | <i>Stipa pulcherrima</i>         | 0 |
| <i>Althaea officinalis</i>       | 0 | <i>Helictotrichon parlatorei</i> | 0 | <i>Stipa tirsia</i>              | 0 |
| <i>Anacamptis pyramidalis</i>    | 0 | <i>Helictotrichon pratense</i>   | 0 | <i>Streptopus amplexifolius</i>  | 0 |
| <i>Anagallis foemina</i>         | 0 | <i>Helictotrichon pubescens</i>  | 0 | <i>Succisa pratensis</i>         | 0 |
| <i>Andromeda polifolia</i>       | 0 | <i>Helictotrichon versicolor</i> | 0 | <i>Swertia perennis</i>          | 0 |
| <i>Androsace lactea</i>          | 0 | <i>Helleborus niger</i>          | 0 | <i>Symphytum tuberosum</i>       | 0 |
| <i>Androsace septentrionalis</i> | 0 | <i>Helleborus viridis</i>        | 0 | <i>Tanacetum corymbosum</i>      | 0 |
| <i>Anemone narcissiflora</i>     | 0 | <i>Hepatica nobilis</i>          | 0 | <i>Tephrosieris crispa</i>       | 0 |
| <i>Anemone nemorosa</i>          | 0 | <i>Heracleum austriacum</i>      | 0 | <i>Tephrosieris helenitis</i>    | 0 |
| <i>Anemone ranunculoides</i>     | 0 | <i>Heracleum sphondylium</i>     | 0 | <i>Tephrosieris integrifolia</i> | 0 |
| <i>Anemone sylvestris</i>        | 0 | <i>Herminium monorchis</i>       | 0 | <i>Tephrosieris tenuifolia</i>   | 0 |
| <i>Angelica archangelica</i>     | 0 | <i>Hierochloa australis</i>      | 0 | <i>Tetragonolobus maritimus</i>  | 0 |
| <i>Angelica palustris</i>        | 0 | <i>Hierochloa hirta</i>          | 0 | <i>Teucrium chamaedrys</i>       | 0 |
| <i>Antennaria carpatica</i>      | 0 | <i>Hierochloa odorata</i>        | 0 | <i>Teucrium montanum</i>         | 0 |
| <i>Anthericum liliago</i>        | 0 | <i>Himantoglossum hircinum</i>   | 0 | <i>Teucrium scordium</i>         | 0 |
| <i>Anthericum ramosum</i>        | 0 | <i>Hippocrepis comosa</i>        | 0 | <i>Thalictrum aquilegifolium</i> | 0 |
| <i>Anthoxanthum alpinum</i>      | 0 | <i>Homogyne alpina</i>           | 0 | <i>Thalictrum flavum</i>         | 0 |
| <i>Anthriscus nitida</i>         | 0 | <i>Homogyne discolor</i>         | 0 | <i>Thalictrum lucidum</i>        | 0 |

|                                 |   |                                  |   |                                 |   |
|---------------------------------|---|----------------------------------|---|---------------------------------|---|
| <i>Anthyllis vulneraria</i>     | 0 | <i>Hordelymus europaeus</i>      | 0 | <i>Thalictrum minus</i>         | 0 |
| <i>Apera spica-venti</i>        | 0 | <i>Horminum pyrenaicum</i>       | 0 | <i>Thalictrum simplex</i>       | 0 |
| <i>Apium repens</i>             | 0 | <i>Hornungia petraea</i>         | 0 | <i>Thesium alpinum</i>          | 0 |
| <i>Aposeris foetida</i>         | 0 | <i>Hyacinthoides non-scripta</i> | 0 | <i>Thesium bavarum</i>          | 0 |
| <i>Aquilegia atrata</i>         | 0 | <i>Hydrocotyle vulgaris</i>      | 0 | <i>Thesium ebracteatum</i>      | 0 |
| <i>Aquilegia einseleana</i>     | 0 | <i>Hypericum elegans</i>         | 0 | <i>Thesium linophyllon</i>      | 0 |
| <i>Arabis auriculata</i>        | 0 | <i>Hypericum hirsutum</i>        | 0 | <i>Thesium pyrenaicum</i>       | 0 |
| <i>Arabis caerulea</i>          | 0 | <i>Hypericum maculatum</i>       | 0 | <i>Thesium rostratum</i>        | 0 |
| <i>Arabis glabra</i>            | 0 | <i>Hypericum montanum</i>        | 0 | <i>Thymus praecox</i>           | 0 |
| <i>Arabis hirsuta</i>           | 0 | <i>Hypericum pulchrum</i>        | 0 | <i>Tofieldia calyculata</i>     | 0 |
| <i>Arabis nemorensis</i>        | 0 | <i>Hypochaeris maculata</i>      | 0 | <i>Tofieldia pusilla</i>        | 0 |
| <i>Arabis pauciflora</i>        | 0 | <i>Hypochaeris uniflora</i>      | 0 | <i>Tolpis staticifolia</i>      | 0 |
| <i>Arabis sagittata</i>         | 0 | <i>Inula britannica</i>          | 0 | <i>Tozzia alpina</i>            | 0 |
| <i>Arabis turrata</i>           | 0 | <i>Inula conyzae</i>             | 0 | <i>Tragopogon orientalis</i>    | 0 |
| <i>Arctium nemorosum</i>        | 0 | <i>Inula germanica</i>           | 0 | <i>Traunsteinera globosa</i>    | 0 |
| <i>Arctostaphylos alpinus</i>   | 0 | <i>Inula hirta</i>               | 0 | <i>Trichophorum alpinum</i>     | 0 |
| <i>Arctostaphylos uva-ursi</i>  | 0 | <i>Inula salicina</i>            | 0 | <i>Trichophorum cespitosum</i>  | 0 |
| <i>Aremonia agrimonoides</i>    | 0 | <i>Iris sibirica</i>             | 0 | <i>Trientalis europaea</i>      | 0 |
| <i>Arenaria biflora</i>         | 0 | <i>Iris variegata</i>            | 0 | <i>Trifolium alpestre</i>       | 0 |
| <i>Arenaria ciliata</i>         | 0 | <i>Isolepis setacea</i>          | 0 | <i>Trifolium badium</i>         | 0 |
| <i>Arnica montana</i>           | 0 | <i>Jasione montana</i>           | 0 | <i>Trifolium medium</i>         | 0 |
| <i>Arnoseris minima</i>         | 0 | <i>Juncus alpinus</i>            | 0 | <i>Trifolium montanum</i>       | 0 |
| <i>Artemisia laciniata</i>      | 0 | <i>Juncus atratus</i>            | 0 | <i>Trifolium ochroleucon</i>    | 0 |
| <i>Artemisia scoparia</i>       | 0 | <i>Juncus conglomeratus</i>      | 0 | <i>Trifolium retusum</i>        | 0 |
| <i>Artemisia umbelliformis</i>  | 0 | <i>Juncus filiformis</i>         | 0 | <i>Trifolium rubens</i>         | 0 |
| <i>Arum maculatum</i>           | 0 | <i>Juncus jacquinii</i>          | 0 | <i>Trifolium spadiceum</i>      | 0 |
| <i>Asarum europaeum</i>         | 0 | <i>Juncus minutulus</i>          | 0 | <i>Trifolium thalii</i>         | 0 |
| <i>Asperula cynanchica</i>      | 0 | <i>Juncus ranarius</i>           | 0 | <i>Triglochin maritimum</i>     | 0 |
| <i>Asperula tinctoria</i>       | 0 | <i>Juncus sphaerocarpus</i>      | 0 | <i>Trinia glauca</i>            | 0 |
| <i>Aster alpinus</i>            | 0 | <i>Juncus subnodulosus</i>       | 0 | <i>Trisetum distichophyllum</i> | 0 |
| <i>Aster amellus</i>            | 0 | <i>Juncus tenageia</i>           | 0 | <i>Trisetum flavescens</i>      | 0 |
| <i>Aster bellidiastrum</i>      | 0 | <i>Juncus trifidus</i>           | 0 | <i>Trisetum spicatum</i>        | 0 |
| <i>Aster linosyris</i>          | 0 | <i>Juncus triglumis</i>          | 0 | <i>Trollius europaeus</i>       | 0 |
| <i>Aster tripolium</i>          | 0 | <i>Juniperus sibirica</i>        | 0 | <i>Urtica kioviensis</i>        | 0 |
| <i>Astragalus alpinus</i>       | 0 | <i>Knautia dipsacifolia</i>      | 0 | <i>Vaccinium myrtillus</i>      | 0 |
| <i>Astragalus australis</i>     | 0 | <i>Knautia drymeia</i>           | 0 | <i>Vaccinium oxycoccos</i>      | 0 |
| <i>Astragalus cicer</i>         | 0 | <i>Knautia kitaibelii</i>        | 0 | <i>Vaccinium uliginosum</i>     | 0 |
| <i>Astragalus danicus</i>       | 0 | <i>Kobresia simpliciuscula</i>   | 0 | <i>Vaccinium vitis-idaea</i>    | 0 |
| <i>Astragalus exscapus</i>      | 0 | <i>Koeleria glauca</i>           | 0 | <i>Valeriana dioica</i>         | 0 |
| <i>Astragalus frigidus</i>      | 0 | <i>Koeleria macrantha</i>        | 0 | <i>Valeriana montana</i>        | 0 |
| <i>Astragalus glycyphyllos</i>  | 0 | <i>Koeleria pyramidata</i>       | 0 | <i>Valeriana pratensis</i>      | 0 |
| <i>Astragalus penduliflorus</i> | 0 | <i>Lactuca perennis</i>          | 0 | <i>Valeriana procurrans</i>     | 0 |
| <i>Astrantia bavarica</i>       | 0 | <i>Lactuca quercina</i>          | 0 | <i>Valeriana sambucifolia</i>   | 0 |
| <i>Astrantia major</i>          | 0 | <i>Lactuca viminea</i>           | 0 | <i>Valeriana saxatilis</i>      | 0 |
| <i>Athamanta cretensis</i>      | 0 | <i>Lappula deflexa</i>           | 0 | <i>Valeriana supina</i>         | 0 |
| <i>Atriplex littoralis</i>      | 0 | <i>Laser trilobum</i>            | 0 | <i>Valeriana versifolia</i>     | 0 |
| <i>Atropa bella-donna</i>       | 0 | <i>Laserpitium latifolium</i>    | 0 | <i>Valeriana wallrothii</i>     | 0 |
| <i>Barbarea stricta</i>         | 0 | <i>Laserpitium prutenicum</i>    | 0 | <i>Valerianella carinata</i>    | 0 |
| <i>Bartsia alpina</i>           | 0 | <i>Laserpitium siler</i>         | 0 | <i>Valerianella dentata</i>     | 0 |
| <i>Bassia laniflora</i>         | 0 | <i>Lathraea squamaria</i>        | 0 | <i>Valerianella rimosa</i>      | 0 |
| <i>Betonica alopecuroides</i>   | 0 | <i>Lathyrus heterophyllus</i>    | 0 | <i>Veratrum album</i>           | 0 |
| <i>Betonica officinalis</i>     | 0 | <i>Lathyrus laevigatus</i>       | 0 | <i>Verbascum densiflorum</i>    | 0 |
| <i>Biscutella laevigata</i>     | 0 | <i>Lathyrus linifolius</i>       | 0 | <i>Verbascum lychnitis</i>      | 0 |
| <i>Bistorta officinalis</i>     | 0 | <i>Lathyrus niger</i>            | 0 | <i>Verbascum nigrum</i>         | 0 |
| <i>Bistorta vivipara</i>        | 0 | <i>Lathyrus palustris</i>        | 0 | <i>Verbascum phlomoides</i>     | 0 |
| <i>Blackstonia acuminata</i>    | 0 | <i>Lathyrus pannonicus</i>       | 0 | <i>Verbascum phoeniceum</i>     | 0 |
| <i>Blackstonia perfoliata</i>   | 0 | <i>Lathyrus pratensis</i>        | 0 | <i>Verbascum pulverulentum</i>  | 0 |
| <i>Blysmus compressus</i>       | 0 | <i>Lathyrus tuberosus</i>        | 0 | <i>Veronica acinifolia</i>      | 0 |
| <i>Bolboschoenus maritimus</i>  | 0 | <i>Lathyrus vernus</i>           | 0 | <i>Veronica alpina</i>          | 0 |
| <i>Bolboschoenus maritimus</i>  | 0 | <i>Lavatera thuringiaca</i>      | 0 | <i>Veronica anagalloides</i>    | 0 |
| <i>Bolboschoenus yagara</i>     | 0 | <i>Leontodon helveticus</i>      | 0 | <i>Veronica aphylla</i>         | 0 |
| <i>Brachypodium rupestre</i>    | 0 | <i>Leontodon incanus</i>         | 0 | <i>Veronica bellidioides</i>    | 0 |

|                                |   |                           |   |                           |   |
|--------------------------------|---|---------------------------|---|---------------------------|---|
| Briza media                    | 0 | Leontodon montanus        | 0 | Veronica dillenii         | 0 |
| Bromus benekenii               | 0 | Leontopodium alpinum      | 0 | Veronica fruticans        | 0 |
| Bromus lepidus                 | 0 | Leonurus marrubiastrum    | 0 | Veronica fruticulosa      | 0 |
| Bromus ramosus                 | 0 | Lepidium graminifolium    | 0 | Veronica montana          | 0 |
| Buglossoides purpureoaeerulea  | 0 | Leucantheropsis alpina    | 0 | Veronica praecox          | 0 |
| Buphthalmum salicifolium       | 0 | Leucantherum adustum      | 0 | Veronica scutellata       | 0 |
| Bupleurum falcatum             | 0 | Leucantherum halleri      | 0 | Veronica teucrium         | 0 |
| Bupleurum longifolium          | 0 | Leucantherum ircutianum   | 0 | Vicia cassubica           | 0 |
| Bupleurum ranunculoides        | 0 | Leucojum vernum           | 0 | Vicia dumetorum           | 0 |
| Bupleurum tenuissimum          | 0 | Ligusticum mutellina      | 0 | Vicia lathyroides         | 0 |
| Calamagrostis arundinacea      | 0 | Ligusticum mutellinoides  | 0 | Vicia oroboides           | 0 |
| Calamagrostis canescens        | 0 | Lilium bulbiferum         | 0 | Vicia pisiformis          | 0 |
| Calamagrostis pseudophragmites | 0 | Lilium martagon           | 0 | Vicia sylvatica           | 0 |
| Calamagrostis varia            | 0 | Limodorum abortivum       | 0 | Vicia tenuifolia          | 0 |
| Calamagrostis villosa          | 0 | Limosella aquatica        | 0 | Vincetoxicum hirundinaria | 0 |
| Calamintha einseleana          | 0 | Linaria alpina            | 0 | Viola alba                | 0 |
| Calamintha menthifolia         | 0 | Lindernia procumbens      | 0 | Viola ambigua             | 0 |
| Calamintha nepeta              | 0 | Linum alpinum             | 0 | Viola biflora             | 0 |
| Calla palustris                | 0 | Linum flavum              | 0 | Viola calcarata           | 0 |
| Caltha palustris               | 0 | Linum perenne             | 0 | Viola canina              | 0 |
| Campanula alpina               | 0 | Linum tenuifolium         | 0 | Viola collina             | 0 |
| Campanula barbata              | 0 | Linum viscosum            | 0 | Viola elatior             | 0 |
| Campanula baumgartenii         | 0 | Liparis loeselii          | 0 | Viola hirta               | 0 |
| Campanula bononiensis          | 0 | Listera cordata           | 0 | Viola kitaibeliana        | 0 |
| Campanula cervicaria           | 0 | Listera ovata             | 0 | Viola mirabilis           | 0 |
| Campanula cochleariifolia      | 0 | Lithospermum officinale   | 0 | Viola montana             | 0 |
| Campanula glomerata            | 0 | Lloydia serotina          | 0 | Viola palustris           | 0 |
| Campanula latifolia            | 0 | Loiseleuria procumbens    | 0 | Viola pumila              | 0 |
| Campanula patula               | 0 | Lomatogonium carinthiacum | 0 | Viola pyrenaica           | 0 |
| Campanula persicifolia         | 0 | Lotus tenuis              | 0 | Viola reichenbachiana     | 0 |
| Campanula rapunculus           | 0 | Luzula alpina             | 0 | Viola rupestris           | 0 |
| Campanula rotundifolia         | 0 | Luzula alpinopilosa       | 0 | Viola schultzei           | 0 |
| Campanula scheuchzeri          | 0 | Luzula campestris         | 0 | Viola stagnina            | 0 |
| Campanula sibirica             | 0 | Luzula divulgata          | 0 | Viola tricolor            | 0 |
| Campanula thyrsoidea           | 0 | Luzula forsteri           | 0 | Virga pilosa              | 0 |
| Campanula trachelium           | 0 | Luzula glabrata           | 0 |                           |   |
| Cardamine alpina               | 0 | Luzula luzulina           | 0 |                           |   |
| Cardamine amara                | 0 | Luzula multiflora         | 0 |                           |   |
| Cardamine dentata              | 0 | Luzula nivea              | 0 |                           |   |
| Cardamine parviflora           | 0 | Luzula pallidula          | 0 |                           |   |
| Cardamine resedifolia          | 0 | Luzula pilosa             | 0 |                           |   |
| Cardamine trifolia             | 0 | Luzula spicata            | 0 |                           |   |
| Cardamine udcicola             | 0 | Luzula sudetica           | 0 |                           |   |
